# Supplementary material for: Safety of immune checkpoint inhibitors in patients with cancer and pre-existing autoimmune disease
Source: PubMed Central journal article supplement — Ann Transl Med. 2021 Jun;9(12):1033. doi: 10.21037/atm-20-8124 (PMC8267316; doi:10.21037/atm-20-8124), 2021-06
Supplement: atm-09-12-1033-dss.pdf [file atm-09-12-1033-dss.pdf]

## Data Sharing Statement

|                     |                                                                                                                                                    |                                                                                                                                                        |
|---------------------|----------------------------------------------------------------------------------------------------------------------------------------------------|--------------------------------------------------------------------------------------------------------------------------------------------------------|
| <b>Article Info</b> | http://dx.doi.org/10.21037/atm-20-8124                                                                                                             |                                                                                                                                                        |
| <b>Item</b>         | <b>Question</b>                                                                                                                                    | <b>Authors' Response<br/>(place "-" if not applicable)</b>                                                                                             |
| 1                   | Would you like to share data collected for your study to others?                                                                                   | Yes                                                                                                                                                    |
| 2                   | If not, would you like to share the reason for your decision?                                                                                      | -                                                                                                                                                      |
| 3                   | What data in particular will be shared?                                                                                                            | Data on Autoimmune disease exacerbation and immune related adverse events while on immune check point inhibitors and the factors associated with this. |
| 4                   | Any other documents will be share? Such as study protocol, statistical analysis plan, informed consent form, clinical study report, analytic code. | Due to the retrospective nature of this study, informed consent was not involved. If requested, analysis plan can be shared.                           |
| 5                   | When will data availability begin?                                                                                                                 | From the publication date.                                                                                                                             |
| 6                   | When will data availability end?                                                                                                                   | A year after publication                                                                                                                               |
| 7                   | To whom will you share the data?                                                                                                                   | Oncologists/rheumatologists interested in studying this topic                                                                                          |
| 8                   | For what type of analysis or purpose?                                                                                                              | For analysis of safety of ICIs in patients with pre-existing autoimmune diseases                                                                       |
| 9                   | How or where can the data/documents be obtained?                                                                                                   | Emails could be sent to the address below to obtain the shared data:<br>nasingh@medicine.washington.edu                                                |
| 10                  | Any other restrictions?                                                                                                                            | We may balance the potential benefits and risks for each request and then provide the data that could be shared.                                       |
